# Supplementary material
Source: PubMed Central journal article supplement (PMC6552391)
Supplement: 848113_Supplemental_Material.pdf [file 848113_Supplemental_Material.pdf]

**Supplementary Table 1: Local and/or specialty-specific guidance and decision aids included in the review.**

| <b>Body</b>                                       | <b>Year</b> | <b>Title</b>                                                                                                                        | <b>Weblink</b>                                                                                                                                                                                                                                                                                  |
|---------------------------------------------------|-------------|-------------------------------------------------------------------------------------------------------------------------------------|-------------------------------------------------------------------------------------------------------------------------------------------------------------------------------------------------------------------------------------------------------------------------------------------------|
| Joint Royal Colleges of Physicians Training Board | 2014        | General Internal Medicine (GIM) ARCP Decision Aid Revised 2014                                                                      | <a href="https://www.jrcptb.org.uk/sites/default/files/2009%20GIM%20ARCP%20Decision%20Aid%20%28revised%2017.11.14%29.pdf">https://www.jrcptb.org.uk/sites/default/files/2009%20GIM%20ARCP%20Decision%20Aid%20%28revised%2017.11.14%29.pdf</a>                                                   |
| Joint Royal Colleges of Physicians Training Board | 2015        | 2010 Cardiology (amendments 2015) ARCP Decision Aid                                                                                 | <a href="https://www.jrcptb.org.uk/sites/default/files/2010%20Cardiology%20ARCP%20Decision%20Aid%20%28revised%202015%29.pdf">https://www.jrcptb.org.uk/sites/default/files/2010%20Cardiology%20ARCP%20Decision%20Aid%20%28revised%202015%29.pdf</a>                                             |
| Joint Royal Colleges of Physicians Training Board | August 2014 | 2010 Paediatric Cardiology ARCP Decision Aid                                                                                        | <a href="https://www.jrcptb.org.uk/sites/default/files/2010%20Paediatric%20Cardiology%20ARCP%20Decision%20Aid%20(revised%20January%202016).pdf">https://www.jrcptb.org.uk/sites/default/files/2010%20Paediatric%20Cardiology%20ARCP%20Decision%20Aid%20(revised%20January%202016).pdf</a>       |
| Joint Royal Colleges of Physicians Training Board | 2014        | Recommendations for specialty trainee assessment and review: Incorporating lessons learnt from the workplace-based assessment pilot | <a href="https://www.jrcptb.org.uk/sites/default/files/April%202014%20Recommendations%20for%20specialty%20trainee%20assessment%20and%20review.pdf">https://www.jrcptb.org.uk/sites/default/files/April%202014%20Recommendations%20for%20specialty%20trainee%20assessment%20and%20review.pdf</a> |

|                                                      |      |                                                                                                                                                               |                                                                                                                                                                                                                           |
|------------------------------------------------------|------|---------------------------------------------------------------------------------------------------------------------------------------------------------------|---------------------------------------------------------------------------------------------------------------------------------------------------------------------------------------------------------------------------|
| Joint Committee on Surgical Training                 | nd   | Certification (CCT/CESR (CP)) checklist for completion at by Trainee and review by LM BEFORE the final ARCP Otolaryngology Specialty Advisory Committee (SAC) | <a href="https://www.jcst.org/quality-assurance/certification-guidelines-and-checklists/">https://www.jcst.org/quality-assurance/certification-guidelines-and-checklists/</a>                                             |
| Bradford General Practice Vocational Training Scheme | nd   | ARCP webpages                                                                                                                                                 | <a href="http://www.bradfordvts.co.uk/educational-supervision/arcp/">http://www.bradfordvts.co.uk/educational-supervision/arcp/</a>                                                                                       |
| Royal College of Pathologists                        | nd   | Histopathology ARCP Decision Aid – Stage D (ST5).                                                                                                             | <a href="https://www.rcpath.org/asset/58F0F8B3-9216-4CE8-B06C5EA601264583.307D505A-41A4-4D34-AACAC436A607E102/">https://www.rcpath.org/asset/58F0F8B3-9216-4CE8-B06C5EA601264583.307D505A-41A4-4D34-AACAC436A607E102/</a> |
| Health Education England Thames Valley               | 2015 | The Educational Supervisor’s Structured Report (Summative Assessment) for the ARCP.                                                                           | <a href="http://www.oxforddeanery.nhs.uk/pdf/ES%20final%20%20report%20instructions2015.pdf">http://www.oxforddeanery.nhs.uk/pdf/ES%20final%20%20report%20instructions2015.pdf</a>                                         |

|                                           |            |                                                     |                                                                                                                                                                                                                                                                   |
|-------------------------------------------|------------|-----------------------------------------------------|-------------------------------------------------------------------------------------------------------------------------------------------------------------------------------------------------------------------------------------------------------------------|
| Health Education England<br>West Midlands |            | ARCP Information Sheet                              | <a href="https://www.westmidlandsdeanery.nhs.uk/LinkClick.aspx?fileticket=RxlruKBKkW8%3D&amp;tabid=536&amp;portalid=0&amp;mid=1472">https://www.westmidlandsdeanery.nhs.uk/LinkClick.aspx?fileticket=RxlruKBKkW8%3D&amp;tabid=536&amp;portalid=0&amp;mid=1472</a> |
| Royal College of Psychiatrists            | April 2008 | ARCP Guidance 2008                                  | <a href="http://www.rcpsych.ac.uk/docs/ARCP%20Guidance%20April%202008%20Final.doc">http://www.rcpsych.ac.uk/docs/ARCP%20Guidance%20April%202008%20Final.doc</a>                                                                                                   |
| Royal College of Psychiatrists            | May 2014   | ARCP for Less Than Full-time &<br>Academic Trainees | <a href="https://www.rcpsych.ac.uk/pdf/ARCP_Guidance_for_LT_FT_and_Academics_May2014.pdf">https://www.rcpsych.ac.uk/pdf/ARCP_Guidance_for_LT_FT_and_Academics_May2014.pdf</a>                                                                                     |

**Supplementary Table 2: Summary of final full-text studies and reports. Main topic addressed in the reports: 1=Statistical relationships with other variables; 2= Demographic differences in outcomes; 3= Stakeholder perceptions; 4=Evaluation or description of process; 5= Preparation and feedback.**

| <b>Authors</b>         | <b>Year</b> | <b>Report theme</b> | <b>Source</b>                             | <b>Report type</b> |
|------------------------|-------------|---------------------|-------------------------------------------|--------------------|
| Tiffin et al;          | 2014        | 1                   | BMJ                                       | Research paper     |
| Pashayan <i>et al.</i> | 2016        | 1                   | Journal of Public Health                  | Research paper     |
| Ludka-Stempien         | 2015        | 1                   | <a href="#">University College London</a> | PhD thesis         |
| Goodyear <i>et al</i>  | 2013        | 1                   | Clinical Teacher                          | Research paper     |
| Gale <i>et al</i>      | 2010        | 1                   | British Journal of Anaesthesia            | Research paper     |
| Davison <i>et al</i>   | 2016        | 1                   | <a href="#">Health Education England</a>  | Research report    |
| Burnand <i>et al</i>   | 2014        | 1                   | R C S Bull                                | Research paper     |
| Bodgener <i>et al</i>  | 2017        | 1                   | Education for Primary Care                | Research paper     |
| Bedward <i>et al</i>   | 2011        | 1,2                 | <a href="#">University of Birmingham</a>  | Research report    |
| Rangan <i>et al</i>    | 2017        | 2                   | BMJ Open                                  | Research paper     |
| Pyne, Ben-Shlomo       | 2015        | 2                   | BMJ Open                                  | Research paper     |
| McKee                  | 2008        | 2                   | Surgery                                   | Description        |

|                         |      |     |                                         |                 |
|-------------------------|------|-----|-----------------------------------------|-----------------|
| General Medical Council | 2016 | 2   | <a href="#">General Medical Council</a> | Research paper  |
| Rothwell                | 2017 | 2,3 | <a href="#">University of Durham</a>    | PhD thesis      |
| Peiris, Cresswell       | 2012 | 2,3 | Surgery                                 | Opinion         |
| Viney <i>et al.</i>     | 2017 | 3   | J R Soc Med                             | Research paper  |
| Vasudev <i>et al</i>    | 201  | 3   | Psychiatrist                            | Research paper  |
| Vasudev <i>et al</i>    | 2010 | 3   | Medical Teacher                         | Research paper  |
| Vance <i>et al</i>      | 2013 | 3   | Clinical Teacher                        | Research paper  |
| Goodyear <i>et al</i>   | 2012 | 3   | Medical Teacher                         | Research paper  |
| Eynon-Lewis, Price      | 2012 | 3   | BMJ Careers                             | Careers article |
| Dormandy, Laycock       | 2016 | 3   | BMJ Careers                             | Careers article |
| Cho <i>et al</i>        | 2014 | 3   | Clinical Medicine                       | Research paper  |
| Edwards, Petra          | 2013 | 4   | Education for Primary Care              | Research report |
| Black                   | 2013 | 4   | Clinical Medicine                       | Opinion         |
| Wentworth <i>et al</i>  | 2011 | 5   | Medical Education                       | Abstract        |
| Ntatsaki <i>et al</i>   | 2015 | 5   | Rheumatology                            | Poster          |
| Gale <i>et al</i>       | 2014 | 5   | Medical Education                       | Brief report    |
| Bindal <i>et al</i>     | 2014 | 5   | The Clinical Teacher                    | Research paper  |
| Ap Dafydd <i>et al</i>  | 2016 | 5   | Adv Med Ed and Prac                     | Description     |

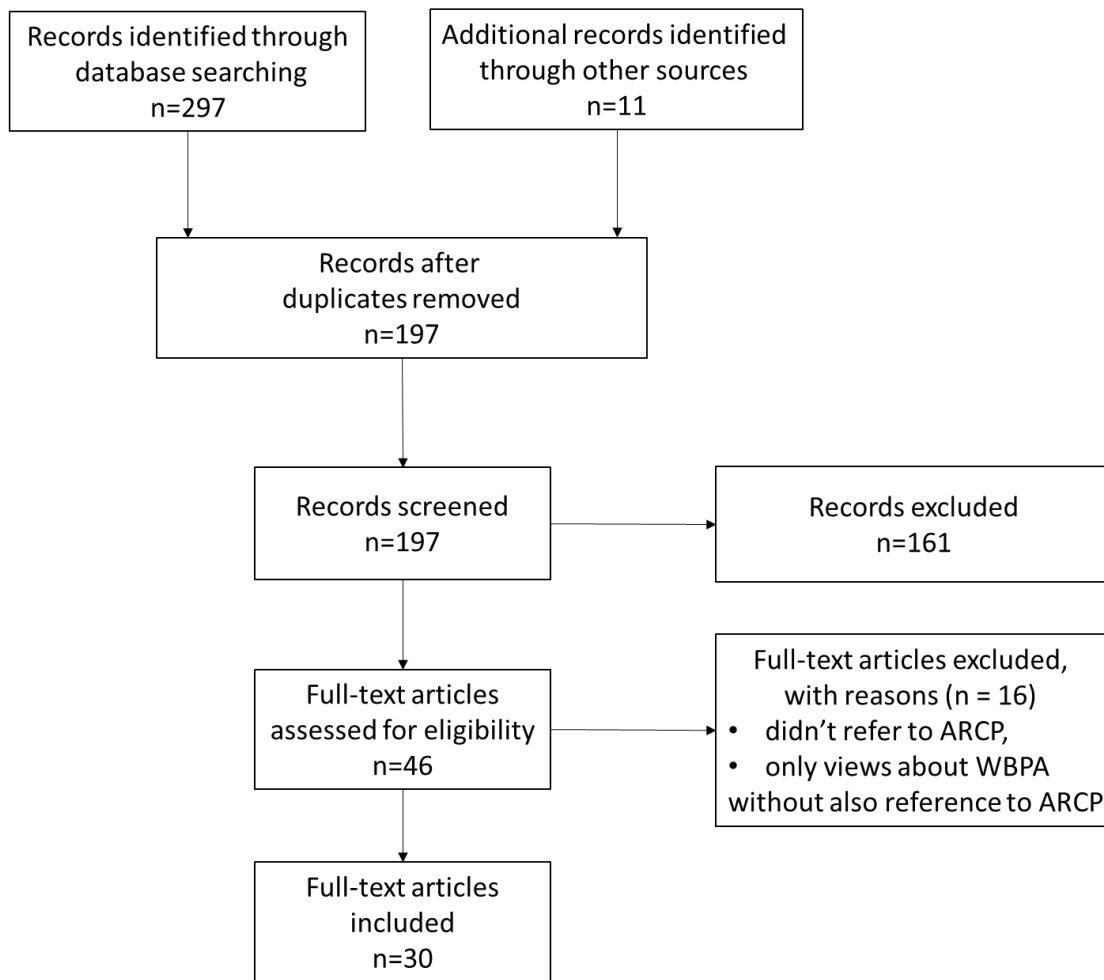

**Supplementary Figure 1: PRISMA Flow diagram for the ARCP literature search**
